# Supplementary material
Source: PubMed Central journal article supplement (PMC4795465)

**Figure 7. Overview of the plasmids generated for fluorescent labeling of microtubules.** General map of the plasmids generated in this study. Also see Table 4.

**Figure S1. Different colony isolates exhibit differential synthetic interactions with *bik1*Δ.** (A) Tetrad dissection progeny from a cross between *bik1*Δ and two independent isolates of *TUB1+3'UTR::HIS3p:Venus-TUB1*. Red boxes indicate *bik1*Δ haploid progeny expressing Venus-Tub1 (with genotype *TUB1+3'UTR::HIS3p:Venus-TUB1 bik1*Δ). (B) Representative images illustrating differences in the fluorescence intensity values between the two isolates of *TUB1+3'UTR::HIS3p:Venus-TUB1* used in (A) for mating with *bik1*Δ. Each image was acquired using identical acquisition settings (60 ms exposure; 4095 gain multiplier on the EM-CCD Cascade-II camera). Color maps are shown with the same brightness and contrast settings (see color bar for intensity scale). Each image is a maximum intensity projection of a 3 μm z stack (0.5 μm step size) of wide-field images.

Figure S1

**A** *TUB1+3'UTR::HIS3p:Venus-TUB1*  
(isolate #1 or #2)  
x  
*bik1Δ*

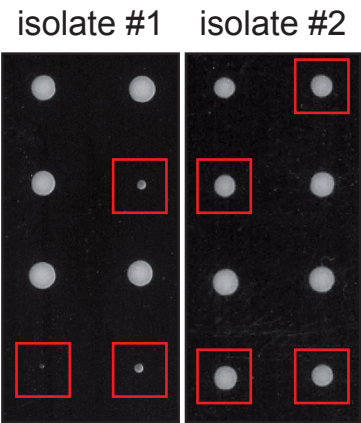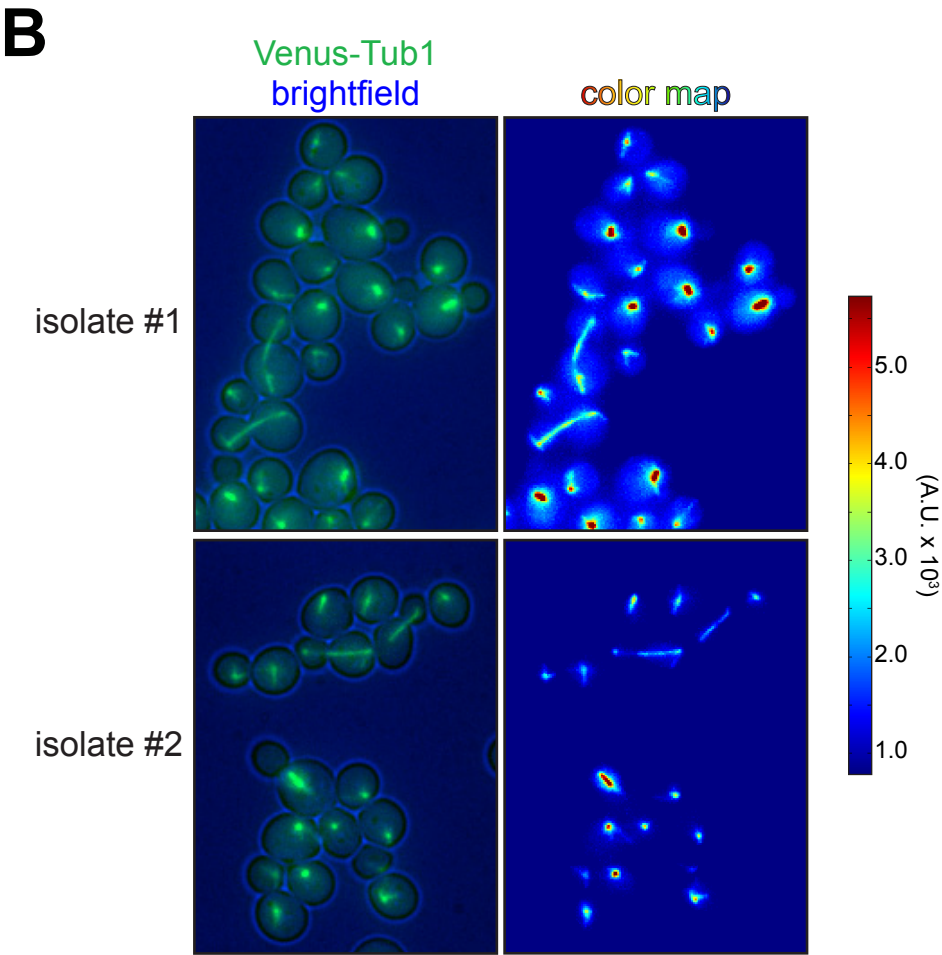

Supplement: NIHMS767006-supplement-01.pdf [file NIHMS767006-supplement-01.pdf]
